# Supplementary material for: A hidden oncogenic positive feedback loop caused by crosstalk between Wnt and ERK Pathways
Source: Springer Nature journal article supplement (doi:10.1038/sj.onc.1210230), 2007-01-22
Supplement: 41388_2007_BF1210230_MOESM1_ESM.pdf [file 41388_2007_BF1210230_MOESM1_ESM.pdf]

## **A Hidden Oncogenic Positive Feedback Loop Caused by Crosstalk Between Wnt and ERK Pathways**

Dongsan Kim<sup>1†</sup>, Oliver Rath<sup>3†</sup>, Walter Kolch<sup>3,4§</sup>, and Kwang-Hyun Cho<sup>1,2\*</sup>

<sup>1</sup>College of Medicine, Seoul National University, Jongno-gu, Seoul, 110-799, Korea

<sup>2</sup>Bio-MAX Institute, Seoul National University, Gwanak-gu, Seoul, 151-818, Korea

<sup>3</sup>Beatson Institute for Cancer Research, Glasgow, G61 1BD, U.K

<sup>4</sup>Institute of Biomedical and Life Science, Univ. of Glasgow, Glasgow G12 8QQ, U.K.

## **Supplementary Information**

---

†These authors contributed equally to this study.

\*Corresponding author: Kwang-Hyun Cho, E-mail: [ckh-sb@snu.ac.kr](mailto:ckh-sb@snu.ac.kr).

§Co-corresponding author: Walter Kolch, E-mail: [w.kolch@beatson.gla.ac.uk](mailto:w.kolch@beatson.gla.ac.uk).

**Table S1.** The summary of state variables and their steady states for a normal system ( $W=0$ ).

| State variables                            | Symbols | Concentrations (nM) |
|--------------------------------------------|---------|---------------------|
| Dsh <sub>i</sub>                           | X1      | 100                 |
| Dsh <sub>a</sub>                           | X2      | 0                   |
| APC*/Axin*/GSK-3 $\beta$                   | X3      | 0.0153              |
| APC/Axin/GSK-3 $\beta$                     | X4      | 0.0076              |
| GSK3 $\beta$                               | X5      | 49.1372             |
| APC/Axin                                   | X6      | 0.0015              |
| APC                                        | X7      | 96.6019             |
| $\beta$ -catenin/APC*/Axin*/GSK-3 $\beta$  | X8      | 0.002               |
| $\beta$ -catenin*/APC*/Axin*/GSK-3 $\beta$ | X9      | 0.002               |
| $\beta$ -catenin*                          | X10     | 0.9881              |
| $\beta$ -catenin                           | X11     | 42.7224             |
| Axin                                       | X12     | 0.0008              |
| TCF                                        | X13     | 6.1879              |
| $\beta$ -catenin/TCF                       | X14     | 8.8121              |
| $\beta$ -catenin/APC                       | X15     | 3.4392              |
| Ras <sub>i</sub>                           | X16     | 200.0000            |
| Ras <sub>a</sub>                           | X17     | 0                   |
| Raf-1                                      | X18     | 112.5585            |
| Raf-1*                                     | X19     | 6.4860              |
| MEK                                        | X20     | 296.1137            |
| MEK*                                       | X21     | 3.8863              |
| ERK                                        | X22     | 297.8897            |
| ERK*                                       | X23     | 2.1103              |
| Raf1/RKIP                                  | X24     | 180.9595            |
| RKIP                                       | X25     | 418.1788            |
| RKIP*                                      | X26     | 0.8619              |
| unknown molecule X                         | X27     | 10.2630             |
| GSK-3 $\beta$ *                            | X28     | 0.85544             |

(Notations: i: inactivated state, a: activated state, /: complex, \*: phosphorylated state)

The conserved molecular concentrations (nM) ( $X_T$ : The total molecular concentration of X):

$$Dsh_T = 100,$$

$$APC_T = 100,$$

$$TCF_T = 15,$$

$$GSK-3\beta_T = 50,$$

$$Ras_T = 200,$$

$$Raf-1_T = 300,$$

$$MEK_T = 300,$$

$$ERK_T = 300,$$

$$RKIP_T = 600.$$

**Table S2.** The mathematical model of the Wnt/ERK signaling pathways.

$$V1 = k_1 * X1 * W$$

$$V2 = k_2 * X2$$

$$V3 = k_3 * X2 * X4$$

$$V4 = k_4 * X4$$

$$V5 = k_5 * X3$$

$$V6 = k_{+6} * X5 * X6 - k_{-6} * X4$$

$$V7 = k_{+7} * X7 * X12 - k_{-7} * X6$$

$$V8 = k_{+8} * X3 * X11 - k_{-8} * X8$$

$$V9 = k_9 * X8$$

$$V10 = k_{10} * X9$$

$$V11 = k_{11} * X10$$

$$V12 = V12$$

$$V13 = k_{13} * X11$$

$$V14 = k_{14} + k_{21} * (X11 + X14) \quad \% \text{We assume that the available } \beta\text{-catenin } (X11+X14) \text{ induces Axin.}$$

$$V15 = k_{15} * X12$$

$$V16 = k_{+16} * X11 * X13 - k_{-16} * X14$$

$$V17 = k_{+17} * X7 * X11 - k_{-17} * X15$$

$$V18 = (V_{max1} * X16 * W / (Km_1 + X16)) * (K_i / (K_i + X23))$$

$$V19 = V_{max2} * X17 / (Km_2 + X17)$$

$$V20 = k_{cat1} * X17 * X18 / (Km_3 + X18)$$

$$V21 = V_{max3} * X19 / (Km_4 + X19)$$

$$V22 = kcat_2 * X19 * X20 / (Km_5 + X20)$$

$$V23 = V_{max4} * X21 / (Km_6 + X21)$$

$$V24 = kcat_3 * X21 * X22 / (Km_7 + X22)$$

$$V25 = V_{max5} * X23 / (Km_8 + X23)$$

$$V26 = kcat_4 * X23 * X24 / (Km_9 + X24)$$

$$V27 = k_{18} * X18 * X25 - k_{19} * X24$$

$$V28 = V_{max6} * X26 / (Km_{10} + X26)$$

$$V29 = kcat_5 * X14^n / (Km_{11}^n + X14^n)$$

$$V30 = k_{20} * X27$$

$$V31 = kcat_6 * X27 * X18 / (Km_{12} + X18)$$

$$V32 = kcat_7 * X23 * X5 / (Km_{13} + X5)$$

$$V33 = V_{max7} * X28 / (Km_{14} + X28)$$

$$dX1/dt = -V1 + V2$$

$$dX2/dt = V1 - V2$$

$$dX3/dt = V4 - V5 - V8 + V10$$

$$dX4/dt = -V3 - V4 + V5 + V6$$

$$dX5/dt = V3 - V6 - V32 + V33$$

$$dX6/dt = V3 - V6 + V7$$

$$dX7/dt = -V7 - V17$$

$$dX8/dt = V8 - V9$$

$$dX9/dt = V9 - V10$$

$$dX10/dt = V10 - V11$$

$$dX11/dt = -V8 + V12 - V13 - V16 - V17$$

$$dX12/dt = -V7 + V14 - V15$$

$$dX13/dt = -V16$$

$$dX14/dt = V16$$

$$dX15/dt = V17$$

$$dX16/dt = -V18 + V19$$

$$dX17/dt = V18 - V19$$

$$dX18/dt = -V20 + V21 + V26 - V27 - V31$$

$$dX19/dt = V20 - V21 + V31$$

$$dX20/dt = -V22 + V23$$

$$dX21/dt = V22 - V23$$

$$dX22/dt = -V24 + V25$$

$$dX23/dt = V24 - V25$$

$$dX24/dt = -V26 + V27$$

$$dX25/dt = -V27 + V28$$

$$dX26/dt = -V28 + V26$$

$$dX27/dt = V29 - V30$$

$$dX28/dt = V32 - V33$$

**Table S3.** The summary of parameter values used for simulation of the Wnt/ERK signaling pathway model.

| Reaction parameters | Values       | Units                                            |
|---------------------|--------------|--------------------------------------------------|
| $k_1$               | 0.182        | $\text{min}^{-1}$                                |
| $k_2$               | 0.0182       | $\text{min}^{-1}$                                |
| $k_3$               | 0.05         | $\text{nM}^{-1} \text{min}^{-1}$                 |
| $k_4$               | 0.267        | $\text{min}^{-1}$                                |
| $k_5$               | 0.133        | $\text{min}^{-1}$                                |
| $k_{+6}/k_{-6}$     | 0.0909/0.909 | $\text{nM}^{-1} \text{min}^{-1}/\text{min}^{-1}$ |
| $k_{+7}/k_{-7}$     | 1/50         | $\text{nM}^{-1} \text{min}^{-1}/\text{min}^{-1}$ |
| $k_{+8}/k_{-8}$     | 1/120        | $\text{nM}^{-1} \text{min}^{-1}/\text{min}^{-1}$ |
| $k_9$               | 206          | $\text{min}^{-1}$                                |
| $k_{10}$            | 206          | $\text{min}^{-1}$                                |
| $k_{11}$            | 0.417        | $\text{min}^{-1}$                                |
| $V_{12}$            | 0.423        | $\text{nM}^{-1} \text{min}^{-1}$                 |
| $K_{13}$            | 0.000257     | $\text{min}^{-1}$                                |
| $k_{14}$            | 0.0000822    | $\text{nM}^{-1} \text{min}^{-1}$                 |
| $k_{15}$            | 0.167        | $\text{min}^{-1}$                                |
| $k_{+16}/k_{-16}$   | 1/30         | $\text{nM}^{-1} \text{min}^{-1}/\text{min}^{-1}$ |
| $k_{+17}/k_{-17}$   | 1/1200       | $\text{nM}^{-1} \text{min}^{-1}/\text{min}^{-1}$ |
| $V_{\text{max}1}$   | 150          | $\text{nM} \text{min}^{-1}$                      |
| $Km_1$              | 10           | $\text{nM}$                                      |
| $k_i$               | 9            | $\text{nM}$                                      |
| $V_{\text{max}2}$   | 15           | $\text{nM} \text{min}^{-1}$                      |
| $Km_2$              | 8            | $\text{nM}$                                      |
| $k_{\text{cat}1}$   | 1.5          | $\text{min}^{-1}$                                |
| $Km_3$              | 15           | $\text{nM}$                                      |

|              |          |                                  |
|--------------|----------|----------------------------------|
| $V_{\max 3}$ | 45       | $\text{nM min}^{-1}$             |
| $Km_4$       | 15       | nM                               |
| $kcat_2$     | 1.5      | $\text{min}^{-1}$                |
| $Km_5$       | 15       | nM                               |
| $V_{\max 4}$ | 45       | $\text{nM min}^{-1}$             |
| $Km_6$       | 15       | nM                               |
| $kcat_3$     | 1.5      | $\text{min}^{-1}$                |
| $Km_7$       | 15       | nM                               |
| $V_{\max 5}$ | 45       | $\text{nM min}^{-1}$             |
| $Km_8$       | 15       | nM                               |
| $kcat_4$     | 1.5      | $\text{min}^{-1}$                |
| $Km_9$       | 9        | nM                               |
| $k_{18}$     | 0.15     | $\text{nM}^{-1} \text{min}^{-1}$ |
| $k_{19}$     | 39       | $\text{min}^{-1}$                |
| $V_{\max 6}$ | 45       | $\text{nM min}^{-1}$             |
| $Km_{10}$    | 12       | nM                               |
| $kcat_5$     | 0.6      | $\text{min}^{-1}$                |
| $Km_{11}$    | 15       | nM                               |
| n            | 2        |                                  |
| $k_{20}$     | 0.015    | $\text{min}^{-1}$                |
| $kcat_6$     | 1.5      | $\text{min}^{-1}$                |
| $Km_{12}$    | 15       | nM                               |
| $kcat_7$     | 1.5      | $\text{min}^{-1}$                |
| $Km_{13}$    | 15       | nM                               |
| $V_{\max 7}$ | 45       | $\text{nM min}^{-1}$             |
| $Km_{14}$    | 15       | nM                               |
| $k_{21}$     | 0.000001 | $\text{min}^{-1}$                |
